# Supplementary material for: Altered serum acylcarnitine profile is associated with the status of nonalcoholic fatty liver disease (NAFLD) and NAFLD-related hepatocellular carcinoma
Source: PubMed Central journal article supplement (PMC6650415; doi:10.1038/s41598-019-47216-2), 2019-07-23
Supplement: 41598_2019_47216_MOESM1_ESM.pdf [file 41598_2019_47216_MOESM1_ESM.pdf]

**Altered serum acylcarnitine profile is associated with the status of  
nonalcoholic fatty liver disease (NAFLD) and NAFLD-related  
hepatocellular carcinoma**

Kenichiro Enooku, Hayato Nakagawa, Naoto Fujiwara, Mayuko Kondo, Tatsuya Minami,  
Yujin Hoshida, Junji Shibahara, Ryosuke Tateishi, Kazuhiko Koike

### **Supplementary Figure legends**

**Supplementary Figure 1.** Relationships between serum levels of acylcarnitine species and liver steatosis grade in patients with NAFLD.

**Supplementary Figure 2.** Relationships between serum levels of acylcarnitine species and lobular inflammation grade in patients with NAFLD.

**Supplementary Figure 3.** Relationships between serum levels of acylcarnitine species and hepatocyte ballooning grade in patients with NAFLD.



# Supplementary figure 2

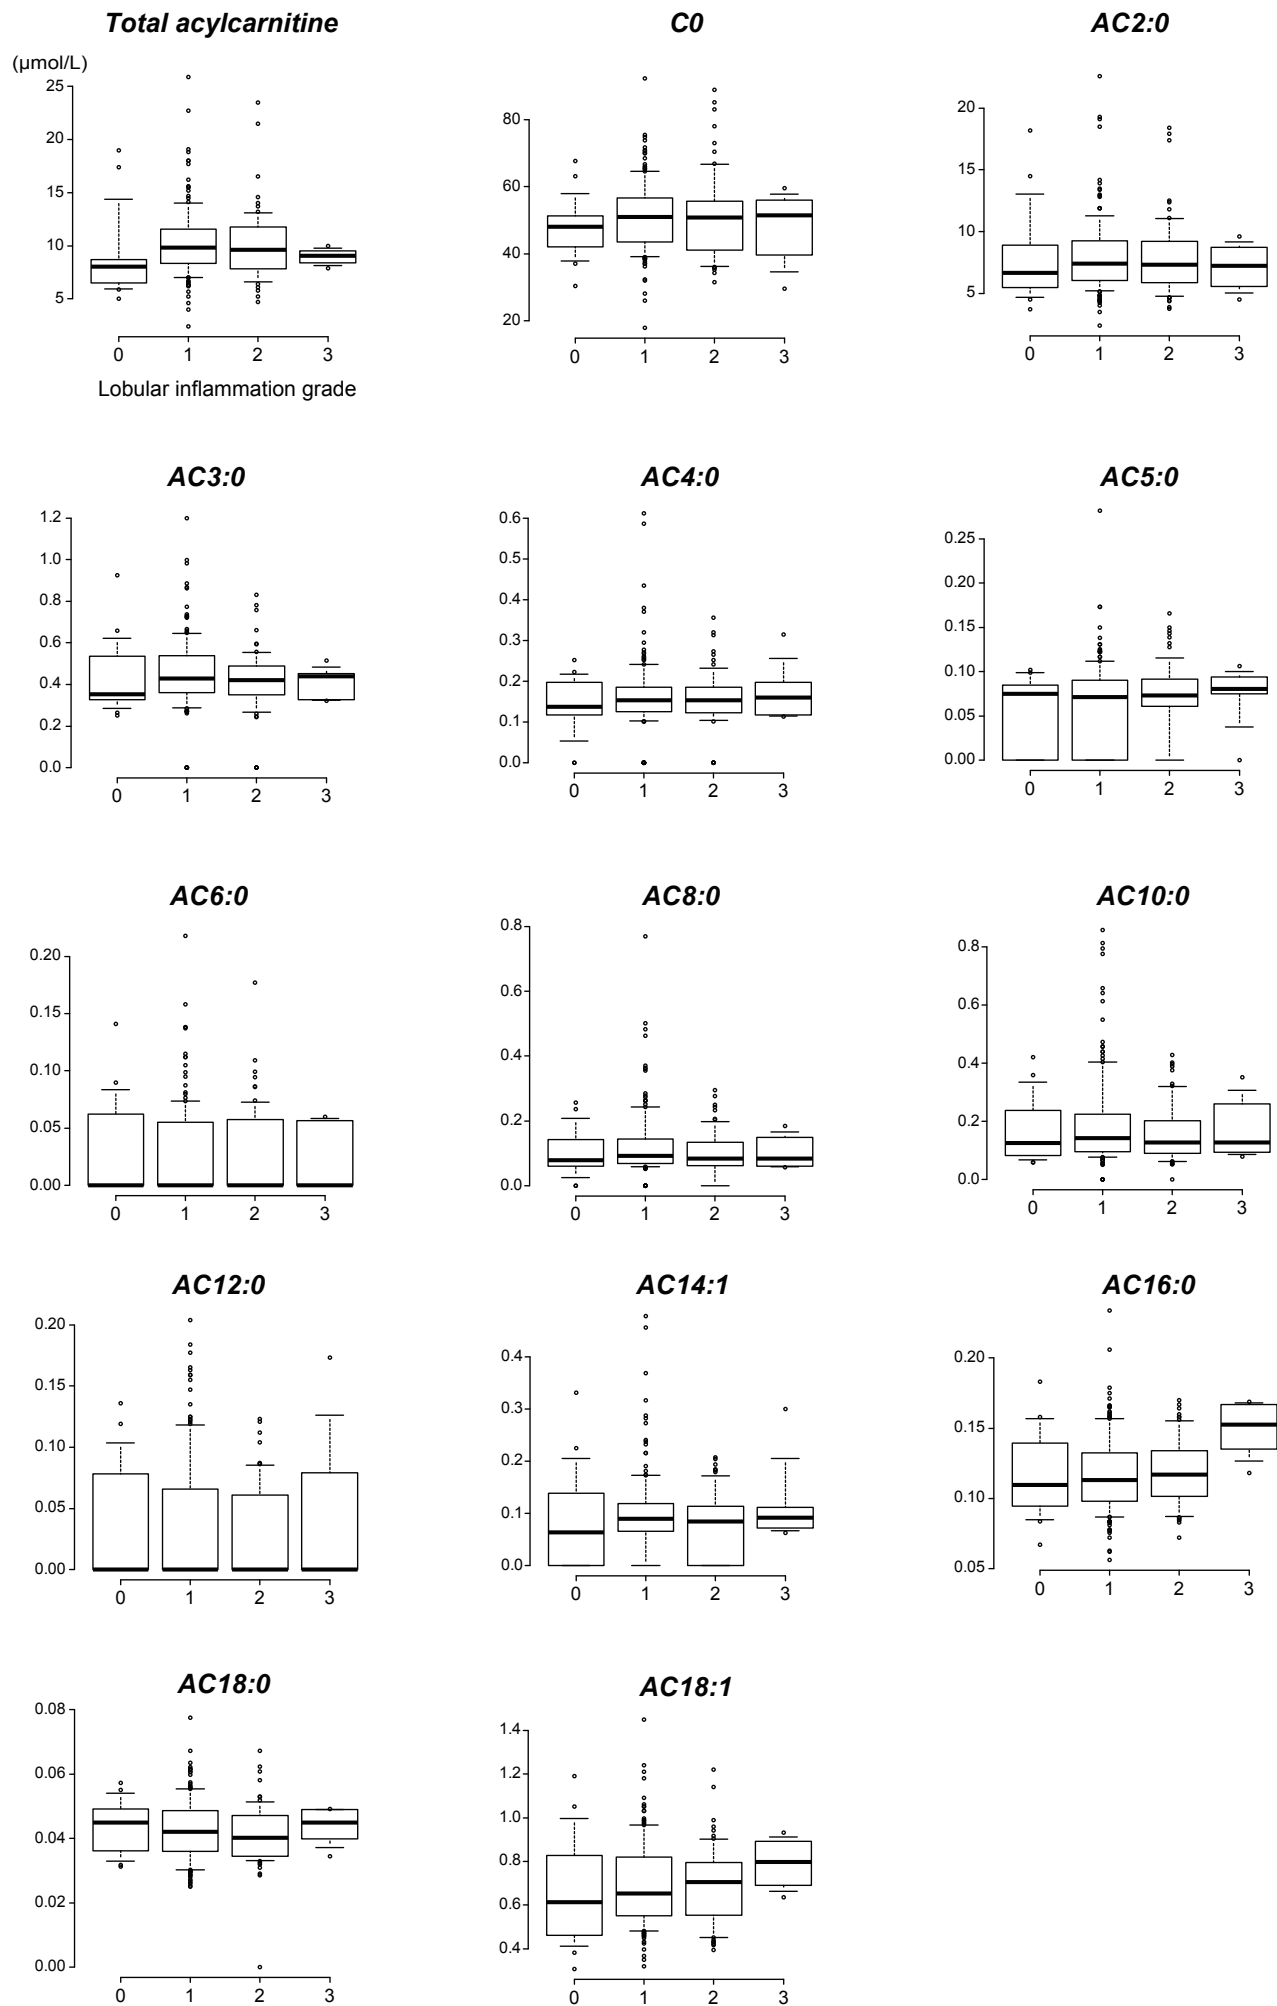

# Supplementary figure 3

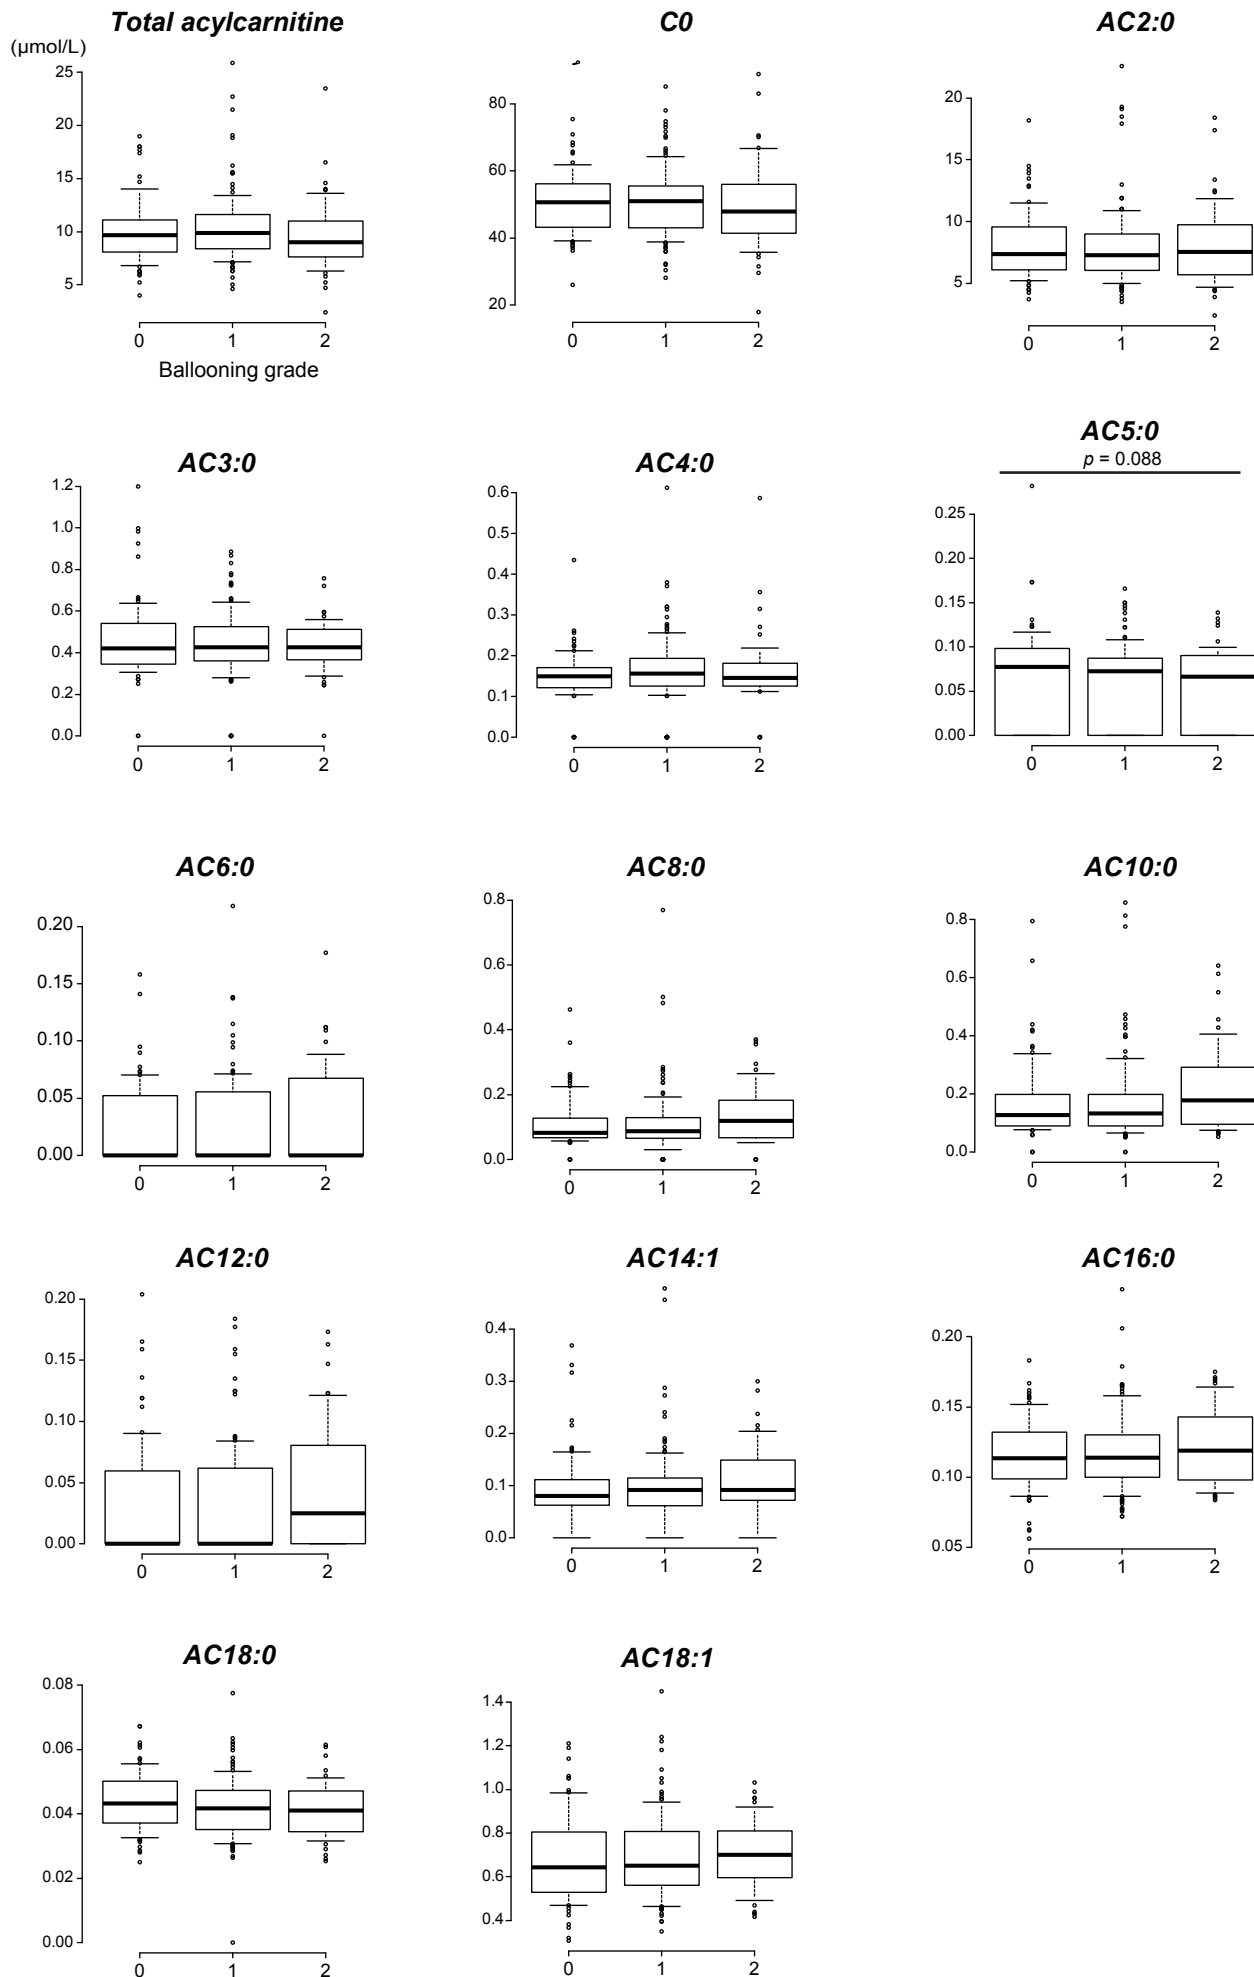

**Supplementary table 1.** Correlations between acylcarnitine species and estimated glomerular filtration rate

| Acylcarnitine species | eGFR           |                |
|-----------------------|----------------|----------------|
|                       | Spearman's Rho | <i>p</i> value |
| Total acylcarnitine   | -0.17          | 0.008          |
| C0                    | -0.21          | 0.001          |
| AC2:0                 | -0.16          | 0.01           |
| AC3:0                 | -0.17          | 0.008          |
| AC4:0                 | -0.29          | < 0.001        |
| AC5:0                 | -0.14          | 0.02           |
| AC6:0                 | 0.06           | 0.31           |
| AC8:0                 | -0.16          | 0.01           |
| AC10:0                | -0.16          | 0.01           |
| AC12:0                | -0.01          | 0.93           |
| AC14:1                | -0.09          | 0.16           |
| AC16:0                | -0.04          | 0.51           |
| AC18:0                | -0.04          | 0.59           |
| AC18:1                | -0.05          | 0.43           |
